# Supplementary material
Source: Springer Nature journal article supplement (https://www.springermedizin.de/resource/supplementary/12943_2007_369_MOESM1_ESM.pdf/9554030)

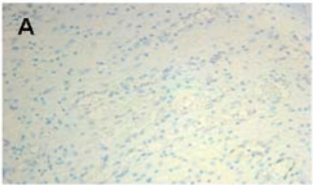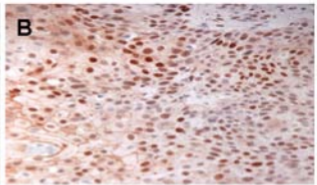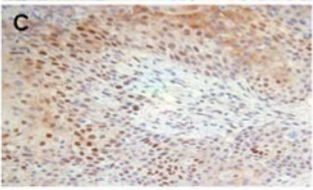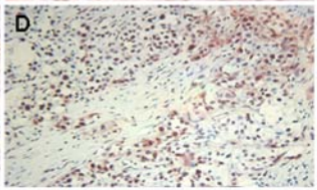

Supplement: MOESM1 [file 9554030]
